# Supplementary material for: Extended enthalpy formulations in the ice flow model ISSM version 4.17: discontinuous conductivity and anisotropic SUPG
Source: Copernicus journal article supplement (doi:10.5194/gmd-2020-78), 2020-04-24
Supplement: Supplementary file [file gmd-2020-78-AC2-supplement.pdf]

We would like to thank the reviewers for their constructive comments that helped to improve the manuscript 'Extended enthalpy formulations in the ice flow model ISSM version 4.17: discontinuous conductivity and anisotropic SUPG'. We have revised the manuscript accordingly and will be happy to provide a new manuscript.

Please find below the reviewer's comments in black and a point-by-point response in blue.

## Review #1

### 1 General comments

This paper introduces two improvements to the thermodynamics represented in the ISSM (Ice Sheet System Model). ISSM is one of most widely used and advanced largescale ice sheet models in the world, and correct treatment of the thermodynamics is needed for many applications. The improvements are related to the discretization scheme rather than physics, but are analyzed in the context of the ice sheet physics. They are well enough described for other developers to see how to implement them, and examples are given that show their benefits. Given that, I think this is a suitable paper for inclusion in GMD. I do think that some minor attention to the manuscript is in order.

We would like to thank Stephen Cornford for the positive feedback.

### 2 Specific comments

1. L17-20 - perhaps include some examples, e.g the thermomechanical instability discussed by e.g Hindmarsh 2009.

Done. We included MacAyeal (1993), Hindmarsh 2009 and Feldmann and Leermann (2017) as prominent examples.

2. L35 'Numerical instabilities inherent to the advection component of this equation tend to occur without stabilizing the standard Galerkin finite element method.' And indeed, any other method.

The paragraph is rewritten to: "*In ISMs, the governing thermodynamic equation are discretized, e.g. using the finite element method (FEM). Special care has to be taken to the parabolic thermodynamic equation as numerical instabilities inherent to the advection component of this equation tend to occur without stabilization. When employing the FEM the standard Galerkin finite element method is often stabilized with the popular Streamline Upwind Petrov–Galerkin (SUPG) method (Brooks\_Hughes, 1982).*"

3. L82 'The temperate ice conductivity'. Expand on this a bit: say what it means physically (e.g transport of latent heat down a moisture gradient and often against a temperature gradient), and indicate typical literature value for  $K_0/K_c$  (including zero)  
We expand and rephrased this section. See beginning of chapter 2.1 in the new version of the manuscript or in the marked-up version attached to this response.

4. L130. Are  $S_1$  and  $S_2$  introduced just fit the equations on the page? That is the impression I get. But I wondered if the sources cited also split  $S$  this way and take some specific interest in each term.

$S_1$  and  $S_2$  were just introduced for a clearer presentation. But you are right, there is no need to split the equation into  $S_1$  and  $S_1$ . In the updated version we present  $S^{\text{ASUPG}}$  in one single equation.

5. L140 (and after) How is  $\theta$  found? And is  $\theta$  a volume?

$\theta$  is a volume fraction. We rephrased the sentences here and give an explanation how  $\theta$  is calculated.

6. 149 'The applicability of the three models is controversial in the literature and depends strongly on the problem' - citation/examples would help here.

You are right, we added a list of references.

7. 'Since heat conduction through porous media is likely a combination of both structures, a geometric mean can be interpreted as accounting for both processes as it always results in a value in between an arithmetic and harmonic mean' - but so would a number of combinations, and you might imagine trying to weight them.

Yes, of course one could design a model as a combination of the arithmetic and harmonic mean that gives similar/comparable results. Indeed, we found studies where such combinations are proposed. We added a sentence and included the references.

8. Figure 1. It is hard to make out the order of the symbols especially for the geometric mean (because they are close together) One solution could be to plot  $|\text{CTS}(\Delta z, K_0) - \text{CTS}(K_0=0, \Delta z=0)|$  (|numerical solution - analytic solution|) on a log scale, though that might only help with the smaller  $K_0$  cases. A sharp eye might then tell what the rate of convergence was, both as  $K_0 \rightarrow 0$  and  $\Delta z \rightarrow 0$ .

Thanks, that's a good recommendation. We updated the figure accordingly.

9. Figure 3. log scales for both x- and y-axes would help to make this figure clear, perhaps with indicative rates  $(\Delta z)^n$  for suitable n. I would also plot  $1/\Delta z$  on the x-axis rather than  $\Delta z$  (so left -> right has increasing number of DoF but that really is a minor detail)

Again, we updated the figure accordingly.

10. Figure 7 the caption does state that ASUPG and SUPG minK overlay one another, but if one line was dashed (or thicker) that could be apparent in the figure.

In the updated figure, we draw the SUPG minK with a thicker line.

### 3 Technical corrections / very minor copy editing suggestions

1. Abstract, first line: 'ice sheets' should be 'ice sheet'?

Done.

2. L30 An increasing number of ice flow models is adopting → ...are adopting, or...have adopted

We changed to "... are adopting ...".

3. L38 convection-dominated. You used 'advection' in a previous line so I would stick with it.

We stuck to "advection".

4. 'The aspect ratio of anisotropic grid-cells in the FEM is particularly problematic' → 'Low aspect ratio mesh elements in the FEM are particularly problematic'?

Changed as suggested.

5. ISMs are dealing with very thin geometries - maybe say 'low aspect ratio' here to be clear.

Changed as suggested.

6. 'For instance, a . . . '→'A . . . '

Done.

7. 'Our work is indeed inspired by the'→'Our work addresses'

Done.

8. L83 'At the upper surface, Dirichlet boundary conditions are imposed'. In this case - but potentially a heat flux might be imposed if coupled with a snow packmodel.

Well, to our knowledge most of the ISM application are not making use of a firnmodel.

Most of the ISMs prescribing temperature/climate data from GCM/RCM products, which are imposed as Dirichlet. We think this is detail that should not be mentioned here.

However, we have rewritten the sentence to: "Dirichlet boundary conditions are imposed at the upper surface in all setups."

9. L100 'bilinear elements'→'Piecewise linear?'

Changed as suggested.

10. L111 'Once the elements become anisotropic or distorted'. Is the 'distorted' helpful here?

We dropped "distorted".

11. L159 'We run' or 'We ran' - not so important I guess but 'methods in the past, results in the present'

Done.

12. L165 'The setup poses a \*reasonable\* situation in glacier modelling' typical? representative?

Yes, maybe 'representative' applies better.

13. L167 'The horizontal velocity...' (and does not vary horizontally)

Done.

14. 174 In this set-up, no stabilization is applied, i.e. the term  $S(E,w)$  in Eq. 4 is ignored. (Because  $Pe$  is small I suppose? but is that the case below the CTS?)

We applied no stabilization in order to be comparable to the ISSM results already published in Kleiner et al. (2015). The  $Pe$  number would require some stabilization in particular for small  $Keff$  values (below the CTS). However, adding some consistent stabilization (SUPG or ASUPG) does not alter the results drastically. We clarified that in the updated version of the manuscript.

15. L214 'without \*the\* necessarily reaching a steady state' (remove the)

Done.

16. L221 (and onward) 'CTS position'. CTS elevation?

Done. Changed in the whole manuscript.

17. L245 'Due to symmetry reason, only'→'Due to symmetry, only'

Done.

18. 'too much diffusion'→'far more diffusion than the other choices?'

Changed as suggested.

19. L265 'the oscillations could cause the temperature to diverge'. From what? In one sense they do already (from the solution, as  $\kappa$  grows), but I think you mean numerical error so severe that it becomes grossly unphysical (e.g.  $E < 0$ , or  $E$  very large) and/or numerical error so severe it causes an iterative solver to produce successively worse approximations (blow up).

We have rephrased it to: "...the oscillations could cause unphysical values or the solver to diverge."

20. L277 'Treating the discontinuous conductivity as a geometric mean'. A bit of rephrasing is needed: the conductivity is not treated as any kind of mean, rather, a particular formula is used when estimating  $K_{\text{eff}}$  at various points.

We added 'Treating ... at the CTS as geometric mean'.

## Review #2

This manuscript describes the formulation of the thermodynamics-enthalpy solver in the ice-sheet model ISSM, including a novel numerical treatment of the discontinuous boundary between temperate and frozen ice within an ice column (known as the CTS). This problem is very important and relevant for ice-sheet modeling today, as more models begin to make use of the enthalpy formulation to simulate polythermal ice. I find the manuscript well written and clear. The methods, including new parameterizations applied here, and the results are straightforward to understand. The benchmark tests make the problem clear, and show the impact of the solution proposed by the authors. I therefore suggest that the manuscript be published with only very minor technical revisions.

We would like to thank Alex Robinson for his positive evaluation.

Minor copy editing comments:

P1L10: are not accounting for => do not account for  
Done.

P10L240: wen => when  
Done.

P10L241: is flipping => flips  
Done.

P11L245: symmetry reason => symmetry  
Done.

P11L249: whole ice column => whole ice profile [I don't see oscillations within a given column]  
Yes, you are right.

P13L271: euclidean => Euclidean  
Done.

Figures: consider using a different/darker color than yellow for the geometric mean points/curves. Since this is the novel result, it would be valuable for it to stand out a bit more in the figures.

We changed the colors: the geometric mean appears a red points/line in the updated figures.

# Extended enthalpy formulations in the ice flow model ISSM version 4.17: discontinuous conductivity and anisotropic SUPG

Martin Rückamp<sup>1</sup>, Angelika Humbert<sup>1,2</sup>, Thomas Kleiner<sup>1</sup>, Mathieu Morlighem<sup>3</sup>, and Helene Seroussi<sup>4</sup>

<sup>1</sup>Alfred-Wegener-Institut Helmholtz-Zentrum für Polar- und Meeresforschung, Bremerhaven, Germany

<sup>2</sup>University of Bremen, Bremen, Germany

<sup>3</sup>Department of Earth System Science, University of California, Irvine, California, USA

<sup>4</sup>Jet Propulsion Laboratory, California Institute of Technology, Pasadena, California, USA

**Correspondence:** Martin Rückamp (martin.rueckamp@awi.de)

**Abstract.** The thermal state of an ice sheet is an important control on its past and future evolution. Some parts of the ice sheets-sheet may be polythermal, leading to discontinuous properties at the cold-temperate transition surface (CTS). These discontinuities require a careful treatment in ice sheet models (ISM). Additionally, the highly anisotropic geometry of the 3D elements in ice sheet modelling poses a problem for stabilization approaches in advection dominated problems. Here, we present extended enthalpy formulations within the finite-element Ice Sheet System Model (ISSM) that show a better performance to earlier implementations. In a first polythermal-slab experiment, we found that the treatment of the discontinuous conductivities at the CTS with a geometric mean produce more accurate results compared to the arithmetic or harmonic mean. This improvement is particularly efficient when applied to coarse vertical resolutions. In a second ice dome experiment, we find that the numerical solution is sensitive to the choice of stabilization parameters in the well-established Streamline Upwind Petrov-Galerkin (SUPG) method. As standard literature values for the SUPG stabilization parameter are not accounting do not account for the highly anisotropic geometry of the 3D elements in ice sheet modelling, we propose a novel Anisotropic SUPG (ASUPG) formulation. This formulation circumvents the problem of high aspect-ratio by treating the horizontal and vertical directions separately in the stabilization coefficients. The ASUPG method provides accurate results for the thermodynamic equation on geometries with very small aspect ratios like ice sheets.

15 *Copyright statement.*

## 1 Introduction

Ice sheets and glaciers are important components of the climate system. Their evolution is one of the primary sources of sea-level change (Church et al., 2013). Besides the interactions of the ice sheet with the environment, changes in ice flow can alter the internal thermal state of the ice, which in turn can affect ice dynamics (e.g. MacAyeal, 1993; Hindmarsh, 2009; Feldmann and Levermann, 2010). Therefore thermo-mechanical numerical modelling of ice sheets is a crucial tool to understand both their past and future evolution.

Ice sheets and glaciers can exhibit a polythermal state that includes both cold (below the pressure melting point) and temperate (at the pressure melting point) domains, separated by the cold–temperate transition surface (CTS) (Blatter and Hutter, 1991). In temperate ice, the heat generated by viscous deformation leads to a change of phase (Fowler, 1984; Blatter and Hutter, 1991), hence temperate ice contains liquid water. The decrease of the ice viscosity with increasing content of liquid water in temperate ice in turn enhances ice flow (Duval, 1977), especially if the temperate ice is present in basal layers, where shear deformation is largest.

Modern state-of-the-art ice sheet models (ISMs) simulate the thermal state according to the enthalpy method originally formulated in Aschwanden et al. (2012) and further developed and verified in Kleiner et al. (2015), Blatter and Greve (2015), Greve and Blatter (2016) and Hewitt and Schoof (2017). The main advantage of this formulation is the elimination of tracking the CTS, as both cold and temperate ice domains are handled within one equation for the enthalpy  $E$ ; temperature  $T$  and liquid water fraction  $\omega$  are diagnostically computed from enthalpy. An increasing number of ice flow models ~~is~~ are adopting an enthalpy scheme (e.g. Aschwanden et al., 2012; Brinkerhoff and Johnson, 2013; Seroussi et al., 2013; Kleiner et al., 2015; Greve and Blatter, 2016; Hoffman et al., 2018).

In ISMs, the governing thermodynamic equation are discretized, e.g. using the finite element method (FEM). Special care has to be taken ~~when employing the FEM~~ to the parabolic thermodynamic equation ~~–Numerical as~~ numerical instabilities inherent to the advection component of this equation tend to occur without ~~stabilizing the~~ stabilization. ~~When employing the FEM the~~ standard Galerkin finite element method ~~–To maintain stabilization, is often stabilized with~~ the popular Streamline Upwind Petrov–Galerkin (SUPG) method ~~is often employed to the discrete problem~~ (Brooks and Hughes, 1982). Although the SUPG method is well-established for ~~convection-dominated~~ advection-dominated problems, the optimal parameter choices are still subject of extensive research (e.g. Tezduyar and Osawa, 2000; John and Knobloch, 2007). ~~The aspect ratio of anisotropic grid-cells~~ Low aspect ratio mesh elements in the FEM ~~is~~ are particularly problematic, and error analysis is often restricted to two dimensions (e.g. John et al., 2018). Moreover, current mathematical and numerical analyses are not always general enough to apply to real-world applications (John et al., 2018).

ISMs are dealing with ~~very thin geometries~~ low aspect ratio, since the ice vertical extent (up to  $\sim 4$  km) is much smaller than its lateral extent (up to several thousands of kilometres). As a consequence, 3D elements are frequently highly anisotropic and pose a challenging problem in order to maintain stabilization. ~~For instance, a~~ A non-optimal choice of stabilization parameters could result either in under- or over-stabilization of the numerical solution. As a consequence of increasing computer power and modern models frequently relying on the FEM, Helanow and Ahlkrona (2018) investigated the accuracy and robustness of linear equal order finite elements discretization with Galerkin least-squares (GLS) stabilization on the Stokes equation system with anisotropic meshes. They found that common literature values for this stabilization scheme perform well on simple domains. However, on more complex geometries, in particular, at the ice margin of outlet glaciers, the choice of standard parameters results in significant oscillations in the vertical component of the surface velocity.

Beside the need for efficient stabilization in FEM, the phase change in the enthalpy formation leads to discontinuous thermal properties. This feature needs to be handled with care when seeking a numerical solution. Of particular concern are discontinuities of the thermal conductivity (Patankar, 1980; Voller and Swaminathan, 1993; Voller, 2001; Nield and Bejan, 2013). Kleiner

et al. (2015) mentioned, that treating the discontinuous conductivity at the CTS as an arithmetic mean causes non-plausible oscillations in the enthalpy solution that are visible, e.g. in a time-varying CTS [positionelevation](#). Our work ~~is indeed inspired by~~ [addresses](#) the current lack of accuracy of the simulated vertical enthalpy profile to the analytical solution obtained with the ice flow model ISSM with a coarse vertical resolution ( $\Delta z=10$  m, Kleiner et al., 2015, see Fig. 4 (upper row) therein).

We describe and analyze here recent developments designed to obtain an enthalpy formulation within the finite-element model ISSM (Ice Sheet System Model, Larour et al., 2012) that performs well over a wide range of grid aspect ratios in advection dominated problems. The focus of this work is twofold: on the one hand, we focus on treatments of discontinuous conductivities at the CTS. Here, we test three formulations for the discontinuous conductivity proposed in Nield and Bejan (2013) for porous medium. On the other hand, we test SUPG formulations on thin geometries like ice sheets. Therefore, we run sensitivity experiments to test distinct parameter choices. One component of this study is the presentation of a novel anisotropic SUPG (ASUPG) method in ice sheet modelling that decouples the vertical from the horizontal direction to account for their different scales. The formulations presented are extensions of the current implementations within the ice flow model ISSM (version 4.17) compared to Seroussi et al. (2013) and Kleiner et al. (2015).

## 70 2 Theory and Background

### 2.1 Mathematical model

Let  $\Omega(t) \subseteq \mathbb{R}^3$  be a three-dimensional domain with  $t \in [0, t_{\max}]$ . The equations are given in Cartesian coordinates, in which  $x$  and  $y$  are in the horizontal plane, and  $z$  is positive upward. The enthalpy balance equation reads

$$\rho_i \left( \frac{\partial E}{\partial t} + \mathbf{v} \cdot \nabla E \right) = -\nabla \cdot \mathbf{q}_i + \Psi, \quad (1)$$

75 with the specific enthalpy (internal energy)  $E$ , the ice velocity vector  $\mathbf{v} = (v_x, v_y, v_z)$ , the ice density  $\rho_i$ , the ~~conductive flux~~ [non-advective enthalpy flux](#)  $\mathbf{q}_i$ , and the heat source ~~by internal deformation~~  $\Psi$ . The enthalpy field equation of the ice–water mixture depends on whether the mixture is cold ~~or temperate. The conductive~~ [\( \$E < E\_{\text{pmp}}\$ \) or temperate \( \$E \geq E\_{\text{pmp}}\$ \)](#), with [\( \$E\_{\text{pmp}}\$  the enthalpy at the pressure melting point. The non-advective enthalpy](#) flux in cold ice is represented by Fourier’s law but replacing temperature  $T$  by  $E$ . In the temperate domain, the ~~conductive non-advective enthalpy~~ flux is the ~~latent heat flux~~ [latent heat flux](#) ~~(for simplicity we ignore here the sum of sensible and latent heat fluxes (e.g. Greve and Blatter, 2009, p. 239). The~~ sensible heat flux ~~is~~ caused by variations in the pressure melting point temperature  ~~$T_{\text{pmp}}(p)$~~ :

$$\mathbf{q}_i = -K_{\text{eff}} \nabla E = - \begin{cases} K_c \nabla E & E < E_{\text{pmp}} \\ K_0 \nabla E & E \geq E_{\text{pmp}} \end{cases},$$

[\( \$T\_{\text{pmp}}\$  according to the Clausius-Clapeyron relation. In contrast, the latent heat flux originates from liquid water mass flux  \$j\$ . A constitutive equation for this flux is needed but is not yet established based on observations and experiments. Here, the liquid](#)

85 water mass flux is assumed to be of Fick-type diffusion (Hutter, 1982)

$$\underline{j = -\nu \nabla \omega = -K_0 \nabla E}, \quad (2)$$

where  $E_{\text{pmp}}$  is the specific enthalpy at the pressure melting point and  $K_c = k_i/c_i$  the enthalpy conductivity in cold ice with  $K_0 = \nu/L$ , the latent heat of fusion  $L$ , the liquid water fraction  $\omega$  and liquid water diffusivity  $\nu$ . The diffusivity is assumed to be constant although it could depend on  $\omega$  (Hutter, 1982). However, other approaches for the water mass flux, e.g. transport according to Darcy's law, are equally feasible (e.g. Fowler, 1984; Hewitt and Schoof, 2017). Sensible heat flux within the temperate ice is assumed to be small compared to heat production due to deformation and considered as a source term in Eq. 1. Thus,

$$\underline{q = -K_{\text{eff}} \nabla E = - \begin{cases} K_c \nabla E & E < E_{\text{pmp}} \\ K_0 \nabla E & E \geq E_{\text{pmp}} \end{cases}}, \quad (3)$$

with  $K_c = k_i/c_i$ , where  $k_i$  is the temperature conductivity and  $c_i$  the specific heat capacity of ice and

$$\underline{\Psi = \begin{cases} \Phi & E < E_{\text{pmp}} \\ \Phi + \nabla \cdot (k_i \nabla T_{\text{pmp}}) & E \geq E_{\text{pmp}} \end{cases}}, \quad (4)$$

where  $\Phi$  is the heat production term due to deformation. The temperature dependence of the heat conductivity and specific heat capacity is neglected. The as well as the contribution of the liquid water conductivity to the ice/water mixture (Eq. 71 in Aschwanden et al., 2012).

In most cases, the liquid water fraction is increasing but temperature is decreasing towards the base, because of the Clausius-Clapeyron relation. Therefore, the transport of latent heat down the liquid water fraction gradient (Eq. 2) occurs against the temperature gradient. However, the temperate ice conductivity  $K_0$  remains poorly constrained as laboratory experiments and field observations are scarce. In the polythermal sided slab experiment proposed in Greve and Blatter (2009, sec. 9.3.6) the liquid water diffusivity is neglected and thus  $K_0 = 0$ . Nevertheless, numerical implementations will automatically generate some numerical diffusion (Greve, 1997). Sometimes a small diffusivity is used for numerical stability rather than physical reasons, e.g.  $K_0 = 10^{-6} \text{ kg m}^{-1} \text{ s}^{-1}$  (Greve and Blatter, 2016). In ISMs typical ratios for  $K_0/K_c$  are between  $10^{-1}$  (Aschwanden et al., 2012) and  $10^{-3}$  (Greve and Blatter, 2016). In this study,  $K_0$  is simply varied to test its sensitivity on the polythermal structure.

At the upper surface, Dirichlet boundary conditions are imposed at the upper surface in all setups. The type of basal boundary condition (Neumann or Dirichlet) is time dependent and follows the decision chart for local basal conditions given in Aschwanden et al. (2012). However, the boundary conditions for the conducted experiments in this study are specified below.

## 110 2.2 Finite element formulation

In ISSM (Larour et al., 2012; Seroussi et al., 2013), the enthalpy equation (Eq. 1) is discretized with piecewise bilinear-linear  $P1 \times P1$  elements and stabilized using the SUPG method according to Franca et al. (2006). The stabilized finite element methods



for Eq. 1 can be written as: find  $E \in H_0^1(\Omega)$  such that

$$B(E, w) = F(w) \quad \forall w \in H_0^1(\Omega), \quad (5)$$

115 where

$$B(E, w) = \left( \frac{\partial E}{\partial t} + \mathbf{v} \cdot \nabla E, w \right) + K_{\text{eff}}(\nabla E, \nabla w) + S(E, w), \quad (6)$$

$$F(w) = (\Psi, w), \quad (7)$$

where  $(\cdot, \cdot)$  is the inner product of the Hilbert space  $H_0^1(\Omega)$  of square integrable functions and derivatives, and are zero on the domain boundary. The term  $S(E, w)$  is added to the standard variational formulation such that consistency is preserved and  
 120 numerical stability enhanced. There are different stabilization schemes that are usually considered (Franca et al., 2006); here we rely on the SUPG method:

$$S^{\text{SUPG}}(E, w) = \sum_K \tau_K (-K_{\text{eff}} \Delta E + \mathbf{v} \cdot \nabla E - \Psi, \mathbf{v} \cdot \nabla w)_K \quad (8)$$

where  $K$  denotes an arbitrary element of the triangulation  $T_h$ ,  $\tau_K$  is a stability coefficient and  $(\cdot, \cdot)_K$  denotes integration over  $K$ . Please note, that for bilinear elements  $\Delta E = 0$ .

125 The stabilization parameter,  $\tau_K$  is formulated as follows (Brooks and Hughes, 1982; Franca et al., 2006)

$$\tau_K = \frac{h_K}{2|\mathbf{v}|} \xi(\text{Pe}_K), \quad (9)$$

$$\text{Pe}_K = \frac{m_k |\mathbf{v}| h_K}{2K_{\text{eff}}}, \quad (10)$$

$$\xi(\text{Pe}_K) = \begin{cases} \text{Pe}_K & 0 \leq \text{Pe}_K < 1 \\ 1 & \text{Pe}_K \geq 1 \end{cases}. \quad (11)$$

$h_K$  is a characteristic dimension of element  $K$  (referred to as local mesh parameter),  $\xi$  is an upwind function and  $\text{Pe}_K$  is the  
 130 local Peclet number. The usual Peclet definition is modified by including  $m_k$ , which takes into account the effect of the degree of interpolation,  $k$ . For linear interpolations,  $m_{k=1}$  is  $1/3$  (Franca et al., 1992). For the velocity norm  $|\mathbf{v}|$  we use the euclidean norm.

### 2.3 Anisotropic SUPG

The standard stabilization techniques were initially developed for isotropic meshes, which essentially require that the ele-  
 135 ments have a similar size in all spatial directions. Once the elements become anisotropic or distorted, the local mesh parameter plays an important role in the calculation of stabilizing coefficients. Various definitions have been utilized based on e.g. the maximum edge length, minimum edge length, circumradius of an element, and the element length aligned with the upwind direction (e.g., Mittal, 2000; Knobloch, 2008; Brinkerhoff and Johnson, 2015). Apart from that, Becker and Rannacher (1995) and Blasco (2008) introduced stabilization coefficients for GLS diffusion that cover geometrical information from different

140 spatial directions. These definitions do not cover the element characteristic that stems from thin 3D elements. In ice sheet modelling, 3D meshes are generally formed by extruding vertically triangular meshes, leading to prismatic elements that are highly anisotropic since the vertical extent is typically one or two orders of magnitude smaller than the horizontal extent. Typically, 15 to 20 horizontal layers are used, with thinner layers close to the base. Considering a one-kilometer thick ice sheet, that is discretized in the horizontal direction between 0.5 km and 20 km, aspect ratios could exceed 100. Taking the maximum edge length as the local mesh parameter  $h_K$ , which is a default choice for isotropic elements, would lead to over-stabilization, while taking the minimum edge length as  $h_K$  would result in under-stabilization.

In order to develop a new SUPG stabilized method for anisotropic meshes, which accounts for geometrical information from the mesh, we consider a Cartesian three-dimensional mesh with prismatic elements. In doing so, we split the traditional SUPG formulation into a horizontal and vertical direction with the stabilization parameters  $\tau_K^{\text{horizontal}}$  and  $\tau_K^{\text{vertical}}$ , respectively. Relying on the ideas for stabilization parameters in different spatial direction by Becker and Rannacher (1995) and Blasco (2008), the anisotropic SUPG (ASUPG) stabilization term  $S(E, w)$  is written as

$$\underline{S^{\text{ASUPG}}(E, w) = S_1(E, w) + S_2(E, w)},$$

$$\underline{S^{\text{ASUPG}}(E, w) = \sum_K \left( \left( \begin{array}{c} v_x \sqrt{\tau_K^{\text{horizontal}}} \\ v_y \sqrt{\tau_K^{\text{horizontal}}} \\ v_z \sqrt{\tau_K^{\text{vertical}}} \end{array} \right) \cdot \nabla E, \left( \begin{array}{c} v_x \sqrt{\tau_K^{\text{horizontal}}} \\ v_y \sqrt{\tau_K^{\text{horizontal}}} \\ v_z \sqrt{\tau_K^{\text{vertical}}} \end{array} \right) \cdot \nabla w \right)_K +$$

$$\underline{\sum_K (-K_{\text{eff}} \Delta E - \Psi, \left( \begin{array}{c} v_x \tau_K^{\text{horizontal}} \\ v_y \tau_K^{\text{horizontal}} \\ v_z \tau_K^{\text{vertical}} \end{array} \right) \cdot \nabla w)_K}.$$

where

$$\underline{S_1(E, w) = \sum_K \left( \left( \begin{array}{c} v_x \sqrt{\tau_K^{\text{horizontal}}} \\ v_y \sqrt{\tau_K^{\text{horizontal}}} \\ v_z \sqrt{\tau_K^{\text{vertical}}} \end{array} \right) \cdot \nabla E, \left( \begin{array}{c} v_x \sqrt{\tau_K^{\text{horizontal}}} \\ v_y \sqrt{\tau_K^{\text{horizontal}}} \\ v_z \sqrt{\tau_K^{\text{vertical}}} \end{array} \right) \cdot \nabla w \right)_K},$$

$$\underline{S_2(E, w) = \sum_K (-K_{\text{eff}} \Delta E - \Psi, \left( \begin{array}{c} v_x \tau_K^{\text{horizontal}} \\ v_y \tau_K^{\text{horizontal}} \\ v_z \tau_K^{\text{vertical}} \end{array} \right) \cdot \nabla w)_K}.$$

The stabilization parameters  $\tau_K^{\text{horizontal}}$  and  $\tau_K^{\text{vertical}}$  are similar to those calculated in Eqs. 9, 10, and 11, but the ASUPG approach replaces the local mesh parameter  $h_K$  with the characteristic horizontal and vertical dimension of the element  $K$ . That means  $h_k$  is replaced by  $h_K^{\text{horizontal}}$  and  $h_K^{\text{vertical}}$  in the two spatial directions. Here, both are calculated as the maximum extent of the element  $K$  in the respective directions.

## 2.4 Treatment of discontinuous conductivity

Since the conductivity is discontinuous at the CTS, special attention must be paid to the treatment of the effective conductivity  $K_{\text{eff}}$  in Eq. 3. The effective thermal conductivity of the solid-fluid system is related to the conductivity of the solid (ice),  $K_c$ , and to the conductivity of the fluid (water),  $K_0$ , and depends in a complex way on the geometry of the medium. In Nield and Bejan (2013), three models are proposed:

1. The effective thermal conductivity is the weighted arithmetic mean:

$$K_{\text{eff}}^{\text{arithmetic}} = \theta K_0 + (1 - \theta) K_c. \quad (14)$$

2. The effective thermal conductivity is the weighted harmonic mean:

$$\frac{1}{K_{\text{eff}}^{\text{harmonic}}} = \frac{\theta}{K_0} + \frac{(1 - \theta)}{K_c}. \quad (15)$$

3. The effective thermal conductivity is given by the weighted geometric mean:

$$K_{\text{eff}}^{\text{geometric}} = K_0^\theta K_c^{(1-\theta)}. \quad (16)$$

The weighting term  $\theta \in [0, 1]$  indicates the volume fraction occupied by liquid water in a grid cell  $K$ . The volume fraction of  $K$  is defined as the sum of the enthalpy in the temperate phase,  $E_t = \sum_i E$  if  $E > E_{\text{pmp}}$ , divided by sum of the enthalpy  $E_m = \sum_i E$ , with  $i$  the number of nodes of  $K$ . It follows that (a)  $\theta$  is zero if  $E_t = 0$  and (b)  $\theta$  is one if the whole grid cell is temperate (i.e.  $E_m = E_t$ ). The discontinuous conductivity model is only evaluated for elements that contain a CTS.

The applicability of the three models is controversial in the literature and depends strongly on the problem (e.g. Midttømme and Roaldset). However, Nield and Bejan (2013) recommend the arithmetic mean if the heat conduction in the solid and fluid phases occurs in parallel. On the other hand, the harmonic mean is appropriate if the structure and orientation of the porous medium is such that the heat conduction takes place in series, with all of the heat flux passing through both solid and fluid. Since heat conduction through porous media is likely a combination of both structures, a geometric mean can be interpreted as accounting for both processes as it always results in a value in between an arithmetic and harmonic mean (assuming  $K_c \neq K_0$ ). Instead of employing a geometric mean a combination of the arithmetic and harmonic mean models may reveal comparable results for the effective conductivity (e.g. combinatory rules are used by Wang et al., 2006; Reddy and Karthikeyan, 2010). When  $K_c$  and  $K_0$  are equal, the three models give the same effective thermal conductivity. For the limit case, where  $K_0 \rightarrow 0$ , the harmonic and geometric mean imply insulating properties as  $K_{\text{eff}} \rightarrow 0$  and no heat flux occurs across the interface; the arithmetic mean retains a non-zero flux.

## 3 Experiments

We ~~run~~ ran several experiments with the emphasis to test our modifications in ISSM on accuracy and on stability. The discontinuous conductivity treatments are verified against an analytical solution within a polythermal slab experiment. As this

experiment results effectively in a one-dimensional vertical experiment, it is not suitable to test the SUPG parameter choices. Therefore, we setup a synthetic second ice dome experiment with variations in the topography. Constants and model parameters used in the experiments are summarized in Tab. 1.

### 195 3.1 Polythermal slab

We repeat the well-established polythermal sided slab experiment proposed in Greve and Blatter (2009) and already applied to ISSM in Kleiner et al. (2015). The setup poses a reasonable-representative situation in glacier modelling with an intra-glacial CTS. The model domain consists of a 200 m thick and  $4^\circ$  downward inclined ice slab. The horizontal velocity  $v_x$  is prescribed as an analytical expression (from  $5 \text{ m a}^{-1}$  at the base towards  $\approx 38 \text{ m a}^{-1}$  at the surface, ~~while  $v_y = 0 \text{ m a}^{-1}$~~ ), ~~and the~~ and  
 200 does not vary horizontally. The vertical velocity is set to be constant and equal to  $v_z = -0.2 \text{ m a}^{-1}$  while  $v_y = 0 \text{ m a}^{-1}$ . In addition, the geothermal heat flux is set to be zero during the model run so that the englacial strain heating is the only source of energy in the enthalpy balance equation.

An analytical solution for the steady-state enthalpy profile based on the solution of Greve and Blatter (2009) leads to a CTS position-elevation 18.95 m above the bed. In our experiments, the conductivity ratio  $K_0/K_c$  is varied from  $10^{-1}$  to  $10^{-5}$ . The  
 205 simulations are performed on equidistant horizontal layers using different vertical resolutions  $\Delta z = (10, 5, 2, 0.5)$  m. ~~In this set-up,~~ To be comparable to the ISSM results published in Kleiner et al. (2015)) no stabilization is applied in this setup, i.e. the term  $S(E, w)$  in Eq. 6 is ignored. Please note that the analytical solution considers  $K_0 = 0 \text{ kg m}^{-1} \text{ s}^{-1}$ . In this experiment, we apply a thermal steady-state solver (i.e.  ~~$\partial/\partial t = 0$~~   $\partial E/\partial t = 0$  in Eq. 1). Comparisons of results when applying a transient solver or a steady-state solver revealed no difference in the steady-state enthalpy profile.

### 210 3.2 Ice dome

In this experiment, a more realistic set-up than the polythermal slab experiment is considered with a three-dimensional ice dome based on the Vialov profile (Vialov, 1958). Other settings and parameters are borrowed from the EISMINT Phase 2 benchmark (Payne et al., 2000). The surface  $z_s$  and bedrock  $z_b$  of the entire ice sheet are defined as:

$$z_b(x, y) = 0, \tag{17}$$

$$215 \quad z_s(x, y) = h(x, y) \\ = 10 + h_{\max} \left( 1 - (r/r_{\max})^{(n+1)/n} \right)^{n/(2n+2)}, \tag{18}$$

with the ice thickness  $h(x, y)$ , the maximum ice thickness  $h_{\max}$ , the radius  $r = \sqrt{x^2 + y^2}$ , the maximum extent  $r_{\max}$ , and the Glen exponent  $n$ . The summit of the ice dome is located at  $(x, y) = (0, 0)$ .

In this experiment, a thermo-mechanical coupling is considered. The Glen–Steinemann power-law rheology (Steinemann,  
 220 1954; Glen, 1955) is used for the deformation of ice. The ice viscosity reads

$$\eta = \frac{1}{2} A^{-1/n} \varepsilon_{\text{eff}}^{-2/n}, \tag{19}$$

where  $A$  is the flow rate factor and  $\dot{\epsilon}_{\text{eff}}$  the effective strain rate (considered as the second invariant of the strain-rate tensor).  $A$  is assumed to be dependent on the temperature  $T^*$  (temperature relative to the pressure melting point  $T_{\text{pmp}}$ ) and liquid water fraction  $\omega$ :

$$225 \quad A = A(T^*, \omega) = \begin{cases} A_0 e^{-Q_a/RT^*} & T^* < T_{\text{pmp}} \\ A_0^t (1 + 181.25\omega) & T^* = T_{\text{pmp}} \end{cases}, \quad (20)$$

where  $A_0$  and  $A_0^t$  are constants,  $Q_a$  is the activation energy for creep, and  $R$  is the gas constant. The constant  $A_0^t$  is equal to  $A(T^* = T_{\text{pmp}}, \omega = 0)$ . The upper bound of the water fraction  $\omega$  is 0.01 to ensure validity of the flow rate factor parameterization in the temperate part with the experimental dataset (Duval, 1977; Liboutry and Duval, 1985).

For the dynamical model, we employ the higher-order Blatter-Pattyn approximation (Blatter, 1995; Pattyn, 2003). Basal  
230 sliding is allowed everywhere and the basal drag,  $\tau_b$ , is written as:

$$\tau_{b,i} = -k^2 N v_{b,i}, \quad (21)$$

where  $v_{b,i}$  is the basal velocity component in the horizontal plane and  $i = x, y$  and  $k^2$  the friction coefficient. The effective pressure is defined as  $N = \rho_i g h$ . At the ice front a zero pressure boundary condition is applied as all the ice is above sea level. A traction-free boundary condition is imposed at the ice/air interface.

235 For the thermal model, we impose a Dirichlet condition at the surface:

$$T(x, y) = 238.15 \text{ K} + 1.67 \times 10^{-5} \text{ K m}^{-1} r. \quad (22)$$

The ice sheet base is subject to the decision chart presented in Aschwanden et al. (2012). In this implementation, the basal boundary condition is allowed to switch between Neumann and Dirichlet type depending on the thermal basal conditions. The geothermal flux,  $q_{\text{geo}}$ , is considered spatially constant.

240 To investigate the sensitivity of over- and under-stabilization, we perform experiments with three different stabilization formulations (Tab. 2). The setup SUPG maxK is the standard SUPG setup based on the maximum edge length of an element  $K$  for the local mesh parameter  $h_K$ . In contrast, the SUPG minK uses the minimum edge length as, however, recommended for anisotropic 2D meshes (Harari and Hughes, 1992; Mittal, 2000). Finally, the ASUPG is employed.

To study whether the stabilization is dependent on different mesh resolutions and the amount of advection, we vary the  
245 horizontal grid size and the amount of sliding. Here, we use a base mesh of 20 km in the interior, which is subsequently refined to  $l_{\text{min}} = (10, 5, 1) \text{ km}$  towards the glacier margin. The friction coefficient is treated as spatially constant and several experiments are performed with  $k^2 = (400, 100, 50) \text{ a m}^{-1}$ . For the three sliding cases, this results in frontal velocities of about 50, 350 and  $1100 \text{ m a}^{-1}$ , respectively. We use 15 layers refined close to the base to account for the high velocity gradients and vertical shearing near the base in the vertical direction. The simulations are run 2000 years forward in time without ~~the~~  
250 necessarily reaching a steady state.

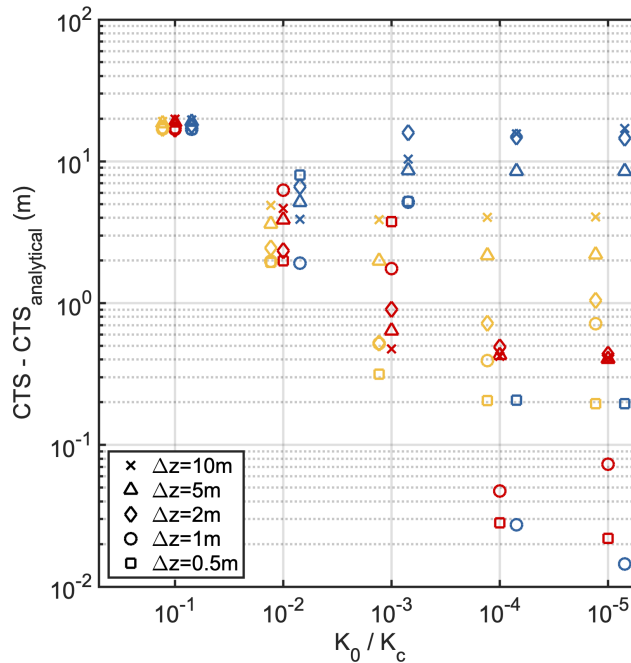

**Figure 1.** Comparison-Difference of simulated steady state CTS positions-elevations to the analytical CTS elevation for different values of the temperate ice conductivity,  $K_0$ , for the polythermal slab experiment. The analytical CTS elevation is 18.95 m. The different conductivity models are shown as: arithmetic-harmonic mean (blue/yellow), harmonic-geometric mean (red) and geometric-arithmetic mean (yellow/blue). Results of different models are slightly shifted on the  $x$ -axis to not overlay each other. The dashed black line indicates the CTS position elevation of the analytical solution derived for  $K_0 = 0 \text{ kg m}^{-1} \text{ s}^{-1}$ .

## 4 Results and Discussion

### 4.1 Polythermal slab

The final steady-state CTS positions-elevations for all simulations are shown in Fig. 1. For the maximum value of temperate ice conductivity ( $K_0/K_c = 10^{-1}$ ), the models result in a CTS position-elevation around 36–39 m. With decreasing  $K_0/K_c$ , the temperate ice layer thickness consistently decreases for the harmonic and geometric mean models and is almost halved for the lowest conductivity ratio  $K_0/K_c = 10^{-5}$ ; the solution converges to the analytical CTS position-elevation for the high mesh resolution. However, for the harmonic mean, we detect a larger spread over the grid-resolutions at low  $K_0/K_c$  compared to the geometric mean. The simulations with the arithmetic mean yield a completely different picture. The range in the CTS position-elevation increases considerably with decreasing  $K_0/K_c$  and the analytical CTS position-elevation is met for the highest mesh resolution, below 2 m.

The steady-state results of the three conductivity models are verified with the analytical solution of the vertical enthalpy profile. Figure 2 shows the simulated vertical enthalpy profiles for  $\Delta z = 10$  and 0.5 m and the lowest conductivity ratio

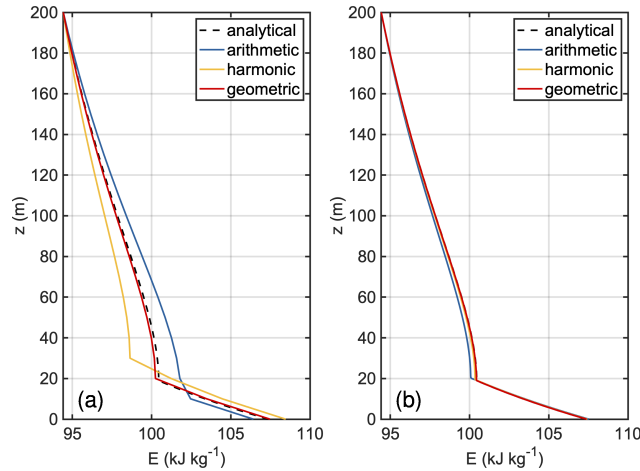

**Figure 2.** Simulated steady-state profiles of the enthalpy  $E$  computed with the three conductivity models with  $K_0/K_c = 10^{-5}$  and a vertical resolution of  $\Delta z = 10$  m (a) and  $\Delta z = 0.5$  m (b) compared to the analytical profile.

$K_0/K_c = 10^{-5}$ . The results of all models agree well with the analytical solution for high resolutions. At coarser resolutions however, the simulated enthalpy profiles differ noticeably from the analytical solution for the arithmetic and the harmonic mean, while the geometric mean coincides well with the analytical solution. Please note, that the results for the harmonic mean are similar to those presented in Kleiner et al. (2015) for ISSM.

The accuracy of the simulations with the lowest conductivity ratio is measured with the root-mean-square error (RMSE) to the analytical solution. The RMSE as a function of vertical resolution is shown in Fig. 3. All three models exhibit different behaviors. The arithmetic mean reveals a somewhat inconsistent behavior, while the harmonic mean shows approximately first-order convergence as  $\Delta z \rightarrow 0$ . Overall, the geometric mean shows low errors, and the error remains on a similarly low level even for coarse resolutions.

The different behaviors highlight the dependency of the solution on the CTS implementation details. As already identified by Kleiner et al. (2015) the usage of an arithmetic mean leads to oscillations in the enthalpy solution that are visible e.g. in a time-varying CTS positionelevation. Consequently, no steady-state solution is reached under these conditions. Here, wen when applying a steady-state solver, the solver does not converge and the CTS position-is-flipping-elevation-flips between the non-linear iterations.

## 4.2 Ice dome

In this experiment, we explore the impact of the parameter choices in the SUPG formulation on the reliability and accuracy of the results. In Fig. 4 the simulated basal enthalpy field is shown for the lowest resolution  $l_{\min} = 10$  km and high sliding case  $k^2 = 50 \text{ a m}^{-1}$  for the three employed stabilization formulations. Due to symmetry~~reason~~, only the upper-right part of the domain is shown. As expected, the SUPG minK produces unphysical oscillations in the simulated enthalpy field. SUPG maxK and ASUPG reveal a smooth result with merely minor oscillations at the ice front, where the surface slopes becomes singular.

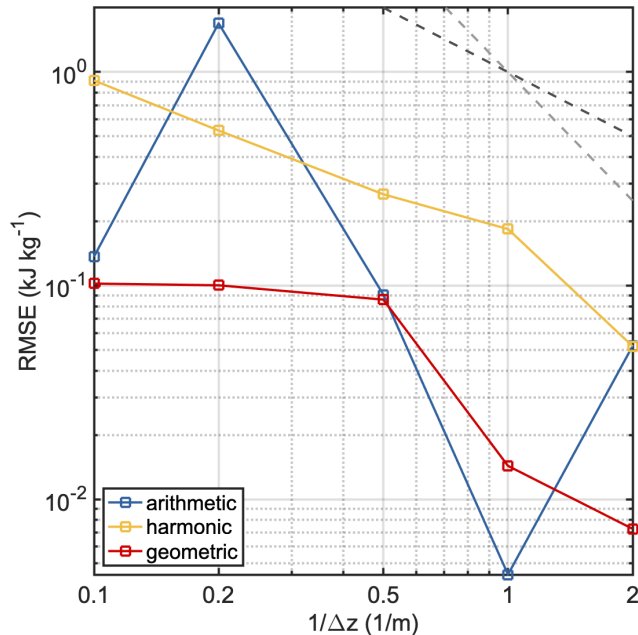

**Figure 3.** Root-mean-square error (RMSE) for the polythermal slab experiment. The RMSE is computed between the modeled enthalpy result and the analytical solution for different vertical grid resolutions  $\Delta z$  and for each conductivity parameterization. Model results for arithmetic-mean (blue), harmonic-mean (red) and geometric-mean (black) are obtained for the lowest conductivity ratio  $K_0/K_c = 10^{-5}$ . The dashed light and darkgrey line shows the indicative rate for  $(\Delta z)^{-1}$  and  $(\Delta z)^{-2}$ , respectively.

The same picture is observed along a vertical profile cross-section of the ice sheet interior (Fig. 5). For the SUPG minK, the numerical oscillations in the enthalpy field are visible in the whole ice column profile. The same qualitative behavior among the SUPG formulations is detected for all employed grid resolutions and sliding cases (Fig. 6). Increasing the mesh resolution leads to a significant reduction in upstream oscillations. However, oscillations still occur close to the ice margin. This is in line with the theory that  $\tau_k$  must vanish as grid refinement increases, and no stabilization may be necessary for sufficiently fine meshes. The amount of basal sliding, which controls the amount of advection, plays a secondary role.

Surprisingly, SUPG maxK and ASUPG are visually indistinguishable and result in qualitatively similar results. However, when re-running the polythermal slab experiment with the three SUPG formulations, distinct differences in the simulated enthalpy are obtained (Fig. 7). The simulations with ASUPG and SUPG minK both match the analytical solution with RMSE=0.01 and 0.01 kJ kg<sup>-1</sup>, respectively. The simulation with SUPG maxK deviates considerably from the analytical solution with RMSE=0.48 kJ kg<sup>-1</sup>. Overall, we find that (1) using SUPG maxK as the local mesh parameter results in an oscillation-free enthalpy field but tends to produce too much diffusion far more diffusion than the other choices, (2) using SUPG minK as the local mesh parameter results in unphysically large oscillations for more complex geometries, and (3) ASUPG provided realistic solutions in all conducted experiments.



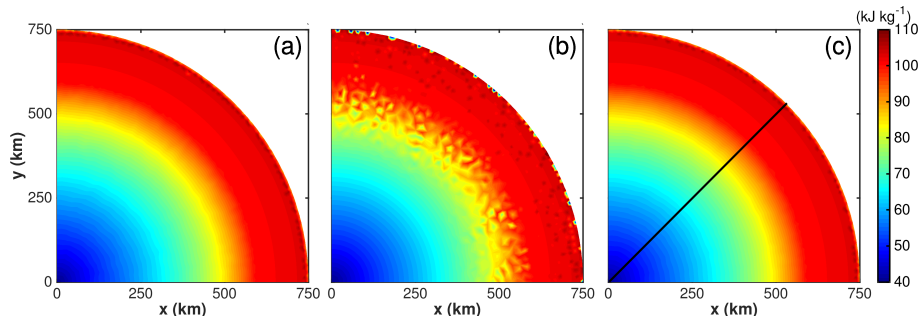

**Figure 4.** Simulated enthalpy ( $\text{kJ kg}^{-1}$ ) for the ice dome experiment with  $l_{\min} = 10\text{km}$  and  $k^2 = 50\text{a m}^{-1}$ . (a) SUPG maxK, (b) SUPG minK, (c) ASUPG. Black line in (c) indicates the location of the [vertical-profile-cross-section](#) is shown in Fig. 5.

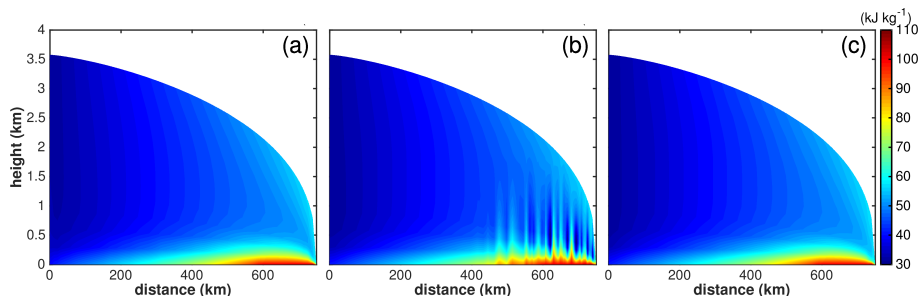

**Figure 5.** Simulated enthalpy ( $\text{kJ kg}^{-1}$ ) for the ice dome experiment with  $l_{\min} = 10\text{km}$  and  $k^2 = 50\text{a m}^{-1}$  along a vertical cross section. (a) SUPG maxK, (b) SUPG minK, (c) ASUPG. The location of the [vertical-profile-cross-section](#) is shown in Fig. 4c.

Our results demonstrate that choosing the stabilization parameter in a heuristic or ad-hoc manner, without knowledge of the possible effects, can impact the solution significantly. Choosing a sub-optimal value for the stabilization parameter can affect the accuracy of the solution, and result in over- or under-stabilization. The viability of the SUPG formulation strongly depends on appropriate parameter choices and in a worst-case scenario, the oscillations could cause [the temperature-unphysical values or the solver](#) to diverge. However, we have not investigated how the solution differences propagate to other components of an ice sheet model, e.g., by coupling to the evolution of the ice thickness.

Since the above-presented solutions for the ASUPG method are excellent, the parameter choices for the local mesh parameters  $h_K^{\text{horizontal}}$ ,  $h_K^{\text{vertical}}$ , and the velocity norm  $|\mathbf{v}|$  are not further investigated. The velocity norm is here treated equally in both directions (Eq. 9), and no differentiation is made between the horizontal and vertical direction. Some test runs (not shown here) applying direction-dependent [euclidean-Euclidean](#) norms of the velocity revealed no discernible differences to the above-presented results. Additionally, in the current implementation, the local mesh parameter in the horizontal direction,  $h_K^{\text{horizontal}}$ , does not cover anisotropy of elements in the horizontal plane. However, these simplifications have so far not led to numerical problems, but might be subject to future work.

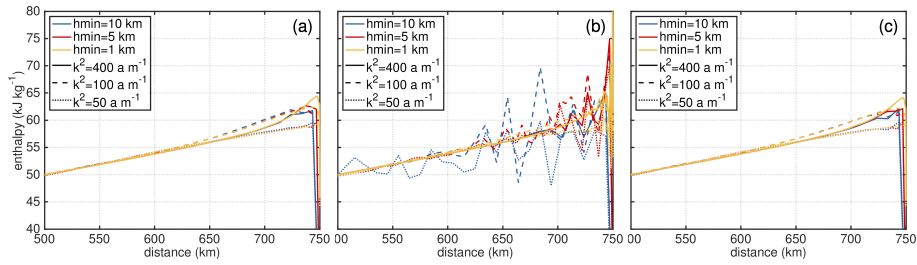

**Figure 6.** Simulated depth-averaged enthalpy ( $\text{kJ kg}^{-1}$ ) for the ice dome experiment along a **vertical** cross section. (a) SUPG maxK, (b) SUPG minK, (c) ASUPG. The location of the **vertical profile cross-section** is shown in Fig. 4c.

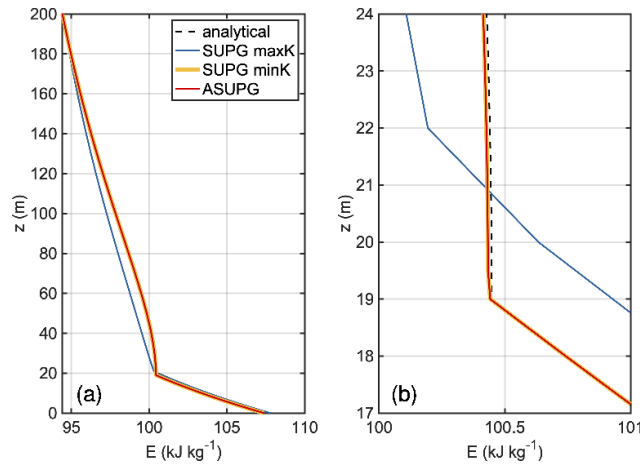

**Figure 7.** Simulated steady-state profiles of the enthalpy  $E$  for the three different SUPG models by employing the geometric mean (Eq. 16) and a vertical resolution of  $\Delta z = 0.5 \text{ m}$  (a). Zoom to CTS region (b). Please note that ASUPG and SUPG minK overlay each other.

## 310 5 Conclusions

We presented extended enthalpy formulations within the ice flow model ISSM compared to Seroussi et al. (2013) and Kleiner et al. (2015). Treating the discontinuous **conductivity conductivities at the CTS** as a geometric mean results in a good solution for coarse resolutions compared to the analytical solution. This treatment is an improvement compared to earlier ISSM results presented in Kleiner et al. (2015) and based on a harmonic mean.

315 Additionally, we tested various SUPG stabilization formulations on their ability to deal with the high aspect ratio of 3D elements in glaciological applications. We found that the traditional parameters in the SUPG stabilization coefficients are susceptible to stabilization parameter choices, here the local mesh parameter which is easily adjustable. We propose a novel anisotropic SUPG (ASUPG) method that circumvents the high aspect-ratio problem in ice sheet modelling by treating the horizontal and vertical direction separately in the stabilization coefficients. The ASUPG method provides accurate results for  
 320 the thermodynamic equation on geometries with very small aspect ratios like ice sheets.

*Code availability.* The ice flow model ISSM version 4.17 (Larour et al., 2012) is open source and freely available at <https://issm.jpl.nasa.gov/> (last access: July 17, 2020).

*Author contributions.* MR conducted the study supported by the other authors. MR set up the experiments conducted with ISSM and analysed the experiments. MM and HS provided technical ISSM support. MR wrote the manuscript together with the other authors.

325 *Competing interests.* The authors declare that they have no conflict of interest.

*Acknowledgements.* Martin Rückamp acknowledges support of the Helmholtz Climate Initiative REKLIM (Regional Climate Change). [We thank Stephen Cornford and Alexander Robinson for the reviews that helped to improve the manuscript.](#) For discussions and suggestions we thank Vadym Aizinger (University Bayreuth), Yonqi Wang (University Darmstadt) and Luca Wester (University of Erlangen).

## References

- 330 Aschwanden, A., Bueller, E., Khroulev, C., and Blatter, H.: An enthalpy formulation for glaciers and ice sheets, *Journal of Glaciology*, 58, 441–457, <https://doi.org/10.3189/2012JoG11J088>, 2012.
- Becker, R. and Rannacher, R.: Finite Element Solution of the Incompressible Navier-Stokes Equations on Anisotropically Refined Meshes, pp. 52–62, Vieweg+Teubner Verlag, Wiesbaden, [https://doi.org/10.1007/978-3-663-14125-9\\_4](https://doi.org/10.1007/978-3-663-14125-9_4), 1995.
- Blasco, J.: An anisotropic GLS-stabilized finite element method for incompressible flow problems, *Computer Methods in Applied Mechanics and Engineering*, 197, 3712–3723, <https://doi.org/10.1016/j.cma.2008.02.031>, 2008.
- 335 Blatter, H.: Velocity and stress fields in grounded glaciers: a simple algorithm for including deviatoric stress gradients, *J. Glaciol.*, 41, 333–344, <https://doi.org/10.3189/S002214300001621X>, 1995.
- Blatter, H. and Greve, R.: Comparison and verification of enthalpy schemes for polythermal glaciers and ice sheets with a one-dimensional model, *Polar Science*, 9, 196–207, <https://doi.org/10.1016/j.polar.2015.04.001>, 2015.
- 340 Blatter, H. and Hutter, K.: Polythermal conditions in arctic glaciers, *Journal of Glaciology*, 37, 261–269, <https://doi.org/10.3189/S0022143000007279>, 1991.
- Brinkerhoff, D. and Johnson, J.: A stabilized finite element method for calculating balance velocities in ice sheets, *Geoscientific Model Development*, 8, 1275–1283, <https://doi.org/10.5194/gmd-8-1275-2015>, 2015.
- Brinkerhoff, D. J. and Johnson, J. V.: Data assimilation and prognostic whole ice sheet modelling with the variationally derived, higher order, open source, and fully parallel ice sheet model VarGlaS, *The Cryosphere*, 7, 1161–1184, <https://doi.org/10.5194/tc-7-1161-2013>, 2013.
- 345 Brooks, A. N. and Hughes, T. J.: Streamline upwind/Petrov-Galerkin formulations for convection dominated flows with particular emphasis on the incompressible Navier-Stokes equations, *Computer Methods in Applied Mechanics and Engineering*, 32, 199–259, [https://doi.org/10.1016/0045-7825\(82\)90071-8](https://doi.org/10.1016/0045-7825(82)90071-8), 1982.
- Church, J. A., Clark, P. U., Cazenave, A., Gregory, J. M., Jevrejeva, S., Levermann, A., Merrifield, M., Milne, G., Nerem, R., Nunn, P., et al.: Sea level change, in: *Climate Change 2013: The Physical Science Basis. Working Group I Contribution to the Fifth Assessment Report of the Intergovernmental Panel on Climate Change*, pp. 1137–1216, Cambridge University Press, 2013.
- 350 Duval, P.: The role of water content on the creep rate of polychristalline ice, *International Association of Hydrological Sciences Publication*, 118, 29–33, 1977.
- Feldmann, J. and Levermann, A.: From cyclic ice streaming to Heinrich-like events: the grow-and-surge instability in the Parallel Ice Sheet Model, *The Cryosphere*, 11, 1913–1932, <https://doi.org/10.5194/tc-11-1913-2017>, 2017.
- 355 Fowler, A. C.: On the transport of moisture in polythermal glaciers, *Geophysical & Astrophysical Fluid Dynamics*, 28, 99–140, <https://doi.org/10.1080/03091928408222846>, 1984.
- Franca, L. P., Frey, S. L., and Hughes, T. J.: Stabilized finite element methods: I. Application to the advective-diffusive model, *Computer Methods in Applied Mechanics and Engineering*, 95, 253–276, [https://doi.org/10.1016/0045-7825\(92\)90143-8](https://doi.org/10.1016/0045-7825(92)90143-8), 1992.
- 360 Franca, L. P., Hauke, G., and Masud, A.: Revisiting stabilized finite element methods for the advective–diffusive equation, *Computer Methods in Applied Mechanics and Engineering*, 195, 1560–1572, <https://doi.org/10.1016/j.cma.2005.05.028>, a Tribute to Thomas J.R. Hughes on the Occasion of his 60th Birthday, 2006.
- Ghanbarian, B. and Daigle, H.: Thermal conductivity in porous media: Percolation-based effective-medium approximation, *Water Resources Research*, 52, 295–314, <https://doi.org/10.1002/2015WR017236>, 2016.

- 365 Glen, J. W.: The Creep of Polycrystalline Ice, *Proceedings of the Royal Society of London. Series A, Mathematical and Physical Sciences*, 228, 519–538, <https://doi.org/10.1098/rspa.1955.0066>, 1955.
- Greve, R.: A continuum-mechanical formulation for shallow polythermal ice sheets, *Philosophical Transactions Royal Society London*, 355, 921–974, <https://doi.org/10.1098/rsta.1997.0050>, 1997.
- Greve, R. and Blatter, H.: Dynamics of Ice Sheets and Glaciers, *Advances in Geophysical and Environmental Mechanics and Mathematics*,  
370 Springer Berlin Heidelberg, <https://doi.org/10.1007/978-3-642-03415-2>, 2009.
- Greve, R. and Blatter, H.: Comparison of thermodynamics solvers in the polythermal ice sheet model SICOPOLIS, *Polar Science*, 10, 11–23, <https://doi.org/10.1016/j.polar.2015.12.004>, 2016.
- Harari, I. and Hughes, T. J.: What are C and h?: Inequalities for the analysis and design of finite element methods, *Computer Methods in Applied Mechanics and Engineering*, 97, 157–192, [https://doi.org/10.1016/0045-7825\(92\)90162-D](https://doi.org/10.1016/0045-7825(92)90162-D), 1992.
- 375 Helanow, C. and Ahlkrona, J.: Stabilized equal low-order finite elements in ice sheet modeling – accuracy and robustness, *Computational Geosciences*, 22, 951–974, <https://doi.org/10.1007/s10596-017-9713-5>, 2018.
- Hewitt, I. J. and Schoof, C.: Models for polythermal ice sheets and glaciers, *The Cryosphere*, 11, 541–551, <https://doi.org/10.5194/tc-11-541-2017>, 2017.
- Hindmarsh, R. C. A.: Consistent generation of ice-streams via thermo-viscous instabilities modulated by membrane stresses, *Geophysical*  
380 *Research Letters*, 36, <https://doi.org/10.1029/2008GL036877>, 2009.
- Hoffman, M. J., Perego, M., Price, S. F., Lipscomb, W. H., Zhang, T., Jacobsen, D., Tezaur, I., Salinger, A. G., Tuminaro, R., and Bertagna, L.: MPAS-Albany Land Ice (MALI): a variable-resolution ice sheet model for Earth system modeling using Voronoi grids, *Geoscientific Model Development*, 11, 3747–3780, <https://doi.org/10.5194/gmd-11-3747-2018>, 2018.
- Hutter, K.: A mathematical model of polythermal glaciers and ice sheets, *Geophysical & Astrophysical Fluid Dynamics*, 21, 201–224,  
385 <https://doi.org/10.1080/03091928208209013>, 1982.
- John, V. and Knobloch, P.: On spurious oscillations at layers diminishing (SOLD) methods for convection-diffusion equations: Part I – A review, *Computer Methods in Applied Mechanics and Engineering*, 196, 2197–2215, <https://doi.org/10.1016/j.cma.2006.11.013>, 2007.
- John, V., Knobloch, P., and Novo, J.: Finite elements for scalar convection-dominated equations and incompressible flow problems: a never ending story?, *Computing and Visualization in Science*, 19, 47–63, <https://doi.org/10.1007/s00791-018-0290-5>, 2018.
- 390 Jorand, R., Fehr, A., Koch, A., and Clauser, C.: Study of the variation of thermal conductivity with water saturation using nuclear magnetic resonance, *Journal of Geophysical Research: Solid Earth*, 116, <https://doi.org/10.1029/2010JB007734>, 2011.
- Kleiner, T., Rückamp, M., Bondzio, J. H., and Humbert, A.: Enthalpy benchmark experiments for numerical ice sheet models, *Cryosphere*, 9, 217–228, <https://doi.org/10.5194/tc-9-217-2015>, 2015.
- Knobloch, P.: On the definition of the SUPG parameter., *ETNA. Electronic Transactions on Numerical Analysis [electronic only]*, 32, 76–89,  
395 <http://eudml.org/doc/130643>, 2008.
- Larour, E., Seroussi, H., Morlighem, M., and Rignot, E.: Continental scale, high order, high spatial resolution, ice sheet modeling using the Ice Sheet System Model (ISSM), *J. Geophys. Res. Earth Surf.*, 117, F01 022, <https://doi.org/10.1029/2011JF002140>, 2012.
- Lliboutry, L. and Duval, P.: Various isotropic and anisotropic ices found in glaciers and polar ice caps and their corresponding rheologies, *Ann. Geophys.*, 3, 207–224, 1985.
- 400 MacAyeal, D. R.: Binge/purge oscillations of the Laurentide Ice Sheet as a cause of the North Atlantic’s Heinrich events, *Paleoceanography*, 8, 775–784, <https://doi.org/10.1029/93PA02200>, 1993.

- Midttømme, K. and Roaldset, E.: Thermal conductivity of sedimentary rocks: uncertainties in measurement and modelling, Geological Society, London, Special Publications, 158, 45–60, <https://doi.org/10.1144/GSL.SP.1999.158.01.04>, 1999.
- Mittal, S.: On the performance of high aspect ratio elements for incompressible flows, *Computer Methods in Applied Mechanics and Engineering*, 188, 269–287, [https://doi.org/10.1016/S0045-7825\(99\)00152-8](https://doi.org/10.1016/S0045-7825(99)00152-8), 2000.
- 405
- Nield, D. A. and Bejan, A.: *Convection in Porous Media*, in *Convection Heat Transfer*, John Wiley & Sons, Inc., Hoboken, NJ, USA, 4 edn., 2013.
- Patankar, S. V.: *Numerical Heat Transfer and Fluid Flow*, McGraw-Hill, New York, 1980.
- Pattyn, F.: A new three-dimensional higher-order thermomechanical ice-sheet model: basic sensitivity, ice-stream development and ice flow across subglacial lakes, *J. Geophys. Res. Solid Earth*, 108, 2382, <https://doi.org/10.1029/2002JB002329>, 2003.
- 410
- Payne, A. J., Huybrechts, P., Abe-Ouchi, A., Calov, R., Fastook, J. L., Greve, R., Marshall, S. J., Marsiat, I., Ritz, C., Tarasov, L., and et al.: Results from the EISMINT model intercomparison: the effects of thermomechanical coupling, *Journal of Glaciology*, 46, 227–238, <https://doi.org/10.3189/172756500781832891>, 2000.
- Reddy, K. S. and Karthikeyan, P.: Combinatory Models for Predicting the Effective Thermal Conductivity of Frozen and Unfrozen Food Materials, *Advances in Mechanical Engineering*, 2, 901–916, <https://doi.org/10.1155/2010/901376>, 2010.
- 415
- Seroussi, H., Morlighem, M., Rignot, E., Khazendar, A., Larour, E., and Mouginot, J.: Dependence of century-scale projections of the Greenland ice sheet on its thermal regime, *J. Glaciol.*, 59, 1024–1034, <https://doi.org/10.3189/2013JoG13J054>, 2013.
- Steinemann, S.: Results of Preliminary Experiments on the Plasticity of Ice Crystals, *Journal of Glaciology*, 2, 404–416, <https://doi.org/10.3189/002214354793702533>, 1954.
- 420
- Tezduyar, T. E. and Osawa, Y.: Finite element stabilization parameters computed from element matrices and vectors, *Computer Methods in Applied Mechanics and Engineering*, 190, 411–430, [https://doi.org/10.1016/S0045-7825\(00\)00211-5](https://doi.org/10.1016/S0045-7825(00)00211-5), 2000.
- Vialov, S. S.: Regularities of glacial shields movement and the theory of plastic viscous flow, *Physics of the movements of ice IAHS*, 47, 266–275, 1958.
- Voller, V.: Numerical treatment of rapidly changing and discontinuous conductivities, *International Journal of Heat and Mass Transfer*, 44, 4553–4556, [https://doi.org/10.1016/S0017-9310\(01\)00089-8](https://doi.org/10.1016/S0017-9310(01)00089-8), 2001.
- 425
- Voller, V. R. and Swaminathan, C.: Treatment of discontinuous thermal conductivity in control-volume solutions of phase-change problems, *Numerical Heat Transfer, Part B Fundamentals*, 24, 161–180, <https://doi.org/10.1080/10407799308955887>, 1993.
- Wang, J., Carson, J. K., North, M. F., and Cleland, D. J.: A new approach to modelling the effective thermal conductivity of heterogeneous materials, *International Journal of Heat and Mass Transfer*, 49, 3075–3083, <https://doi.org/10.1016/j.ijheatmasstransfer.2006.02.007>, 2006.

**Table 1.** Used constants and model parameters.

| Quantity                                     | Value                                     | Unit              |
|----------------------------------------------|-------------------------------------------|-------------------|
| Seconds per year, $spy$                      | 31556926                                  | $sa^{-1}$         |
| Gravitational acceleration, $g$              | 9.81                                      | $ms^{-2}$         |
| Density of ice, $\rho_i$                     | 910                                       | $kgm^{-3}$        |
| Density of water, $\rho_w$                   | 1000                                      | $kgm^{-3}$        |
| Reference temperature, $T_{ref}$             | 223.15                                    | K                 |
| Melting point at<br>standard pressure, $T_0$ | 273.15                                    | K                 |
| Specific heat capacity, $c_i$                | 2009.0                                    | $Jkg^{-1}K^{-1}$  |
| Thermal conductivity, $k_i$                  | 2.1                                       | $Wm^{-1}K^{-1}$   |
| Glen exponent, $n$                           | 3                                         |                   |
| <b>Polythermal slab:</b> <sup>a</sup>        |                                           |                   |
| Ice thickness, $H$                           | 200                                       | m                 |
| Geothermal heat flux, $q_{geo}$              | 0.0                                       | $Wm^{-2}$         |
| Latent heat of fusion, $L$                   | $3.35 \times 10^5$                        | $Jkg^{-1}$        |
| Clausius-Clapeyron constant, $\beta$         | 0.0                                       | $KPa^{-1}$        |
| Rate-factor, $A$                             | $5.3 \times 10^{-24}$                     | $Pa^{-3}s^{-1}$   |
| Temperate ice conductivity, $K_0$            | $k_i/c_i \times 10^{-1}$                  |                   |
|                                              | $\vdots$                                  |                   |
|                                              | $k_i/c_i \times 10^{-5}$                  | $kgm^{-1}s^{-1}$  |
| <b>Ice dome:</b> <sup>b</sup>                |                                           |                   |
| Maximum thickness, $h_{max}$                 | 3575.1                                    | m                 |
| Maximum extent, $r_{max}$                    | 750                                       | km                |
| Geothermal heat flux, $q_{geo}$              | 0.042                                     | $Wm^{-2}$         |
| Latent heat of fusion, $L$                   | $3.34 \times 10^5$                        | $Jkg^{-1}$        |
| Clausius-Clapeyron constant, $\beta$         | $9.8 \times 10^{-8}$                      | $KPa^{-1}$        |
| Temperate ice conductivity, $K_0$            | $k_i/c_i \times 10^{-2}$                  | $kgm^{-1}s^{-1}$  |
| Universal gas constant, $R$                  | 8.314                                     | $Jmol^{-1}K^{-1}$ |
| Activation energy for creep, $Q_a$           | $6 \times 10^4$ if $T^* < 263.15K$        | $kJmol^{-1}$      |
|                                              | $13.9 \times 10^4$ if $T^* > 263.15K$     | $kJmol^{-1}$      |
| Constant of proportionality, $A_0$           | $3.61 \times 10^{-13}$ if $T^* < 263.15K$ | $Pa^{-3}s^{-1}$   |
|                                              | $1.73 \times 10^3$ if $T^* > 263.15K$     | $Pa^{-3}s^{-1}$   |

<sup>a</sup>based on Greve and Blatter (2009)<sup>b</sup>based on Vialov (1958) and Payne et al. (2000)

**Table 2.** List of employed stabilization approaches

| experiment label | description                                                                                                  |
|------------------|--------------------------------------------------------------------------------------------------------------|
| SUPG maxK        | SUPG formulation (Eq. 8) with $h_k$ as the maximum edge of the 3D element $K$                                |
| SUPG minK        | SUPG formulation (Eq. 8) with $h_k$ as the minimum edge of the 3D element $K$                                |
| ASUPG            | anisotropic SUPG (Eqs. 13, 14 and 14) formulation with $h_K^{\text{horizontal}}$ and $h_K^{\text{vertical}}$ |
